# Supplementary material for: Color-tunable emission from violet-blue to pure-blue based on 5,9-disubstituted pyrene derivativesviaengineering of aryl-side groups
Source: Royal Society of Chemistry journal article supplement (doi:10.1039/d2tc01723g), 2022-01-01
Supplement: d2tc01723g1.pdf [file d2tc01723g1.pdf]

*Supplementary Data for*

## **Color-Tunable Emission from Violet-Blue to Pure-Blue Based on 5,9-Disubstituted Pyrene Derivatives by Engineering of Aryl-Side Groups**

*Fuli Xie,<sup>a</sup> Xilin Yang,<sup>b</sup> Pengcheng Jin,<sup>a</sup> Xiao-Tian Wang,<sup>a</sup> Huijuan Ran,<sup>a</sup> Rong Zheng,<sup>a</sup>*

*Zheng Lei,<sup>a</sup> Hailu Zhang,<sup>a</sup> Shi-Jian Su<sup>b,\*</sup> and Jian-Yong Hu<sup>a,\*</sup>*

*<sup>a</sup>Key Laboratory of Applied Surface and Colloid Chemistry, National Ministry of Education; Shaanxi Key Laboratory for Advanced Energy Devices; Shaanxi Engineering Lab for Advanced Energy Technology, School of Materials Science and Engineering, Shaanxi Normal University, Xian 710119, PR China*

*<sup>b</sup>State Key Laboratory of Luminescent Materials and Devices and Institute of Polymer Optoelectronic Materials and Devices, South China University of Technology, Wushan Road 381, Guangzhou 510640, PR China*

*E-mail: [hujianyong@snnu.edu.cn](mailto:hujianyong@snnu.edu.cn); [mssjsu@scut.edu.cn](mailto:mssjsu@scut.edu.cn)*

# **Content**

**1. Materials and Instruments**

**2. Synthesis and Characterization**

**3. DFT Calculations**

**4. Photophysical Properties**

**5. Device Performance**

**6. NMR Spectra**

**7. Mass Spectra**

**8. References**

## 1. Materials and Instruments

All commercially available reagents and chemicals were used as received without further purification. The intermediate of 7-*tert*-butyl-5,9-dibromo-1,3-diphenylpyrene was synthesized in the light of reported literature <sup>[S1]</sup>, and the arylboronic acids were commercialized. The detailed apparatus and methods of the characterization techniques for these compounds were presented in Ref.<sup>[S2]</sup> <sup>1</sup>H NMR spectra were measured on a JEOL 400 MHz FT-400 NMR spectrometer. Mass spectra were obtained with a Bruker microflex mass spectrometer in MALDI-TOF mode. Thermogravimetric analysis (TGA) analysis was performed on a USA Waters Q600 under nitrogen atmosphere at a heating rate of 10 °C min<sup>-1</sup> and Differential scanning calorimetry (DSC) analysis was carried out on METTLER TOLEDO DSC at a heating rate of 10 °C min<sup>-1</sup>. Cyclic voltammetry (CV) were performed on a BAS 100W Bioanalytical Systems, using a platinum wire as the auxiliary electrode, a glass carbon disk as the working electrode and a silver/Silver chloride (Ag/Ag<sup>+</sup>) as the reference electrode, standardized for the redox couple ferricinium/ferrocene (Fc/Fc<sup>+</sup>). Absorption spectrum were measured on a PerkinElmer UV-Lambda 950 spectrophotometer. Photoluminescence spectra were recorded on a Shimadzu F-7000 spectrofluorometer. Absolute PL quantum yields were measured with a Japan Hamamatsu C9920-06G. Fluorescence lifetimes were determined with a Edinburgh FLS1000 Quantaaurus-Tau time-

resolved spectrometer. All the OLEDs were characterized by HAMAMATSU PHOTONIC MULTI-CHANNEL ANALYZER PMA-12, along with a Keithley 2400 Source Meter. The area of the single device was 3 mm × 3 mm and the testing conditions were under ambient conditions. The frontier orbitals of the molecules based on the ground state geometries were calculated at B3LYP/6-31G\* by Gaussian 16 program.

## 2. Synthesis and Characterization

**Synthesis of 7-tert-butyl-1,3,5,9-tetraphenylpyrene (Py-BBz):** A mixture of 7-tert-butyl-1,3-diphenyl-5,9-dibromopyrene (681 mg, 1.2 mmol),<sup>S1</sup> phenylboronic acid (484 mg, 4.0 mmol) in toluene (50 mL), and ethanol (20 mL) at room temperature was stirred under N<sub>2</sub> atmosphere, and a 2.0 M aqueous solution of K<sub>2</sub>CO<sub>3</sub> (20 mL) and Pd(PPh<sub>3</sub>)<sub>4</sub> (170 mg) were added. The mixture was heated to 110°C under stirring for 16h. After cooling to room temperature, the mixture was quenched with water, extracted with toluene, and washed with water. The organic extracts were dried with MgSO<sub>4</sub>, and the solvent was evaporated. The residue was purified by column chromatography eluting with petroleum ether (PE) and recrystallized from CH<sub>2</sub>Cl<sub>2</sub>/hexane (v/v, 1/1) to give **Py-BBz** (465 mg, 69%) as a white powder. <sup>1</sup>H NMR (400 MHz, CDCl<sub>3</sub>): δ = 1.36 (s, 9H), 7.50–7.40 (m, 4H), 7.57–7.50 (m, 8H), 8.17 (s, 2H), 7.65 (dd, *J* = 8.1, 1.2 Hz, 4H), 7.70 (dd, *J* = 8.0, 1.0 Hz, 4H), 7.98 (s, 1H), 8.17 (s, 2H), 8.29 (s, 2H) ppm. <sup>13</sup>C NMR (100 MHz, CDCl<sub>3</sub>): δ = 148.75, 141.44, 141.21, 139.89, 137.33, 130.73, 130.59, 130.26, 129.81, 128.56, 128.50, 127.52, 127.39, 127.34, 125.68, 124.58, 124.24, 121.49, 35.54, 31.78. MS: *m/z* calcd. for C<sub>44</sub>H<sub>24</sub> 562.2431; Found 562.4787 [M<sup>+</sup>].

**Synthesis of 7-tert-butyl-5,9-di(naphthalen-2-yl)-1,3-diphenylpyrene (Py-B2Na):** adopting the above method with a mixture of 7-tert-butyl-1,3-diphenyl-5,9-dibromopyrene (681 mg, 1.2 mmol) and 2-

naphthaleneboronic acid (687 mg, 4.0 mmol) and obtained **Py-B2Na** (492 mg, 61%) as a white powder. <sup>1</sup>H NMR (400 MHz, CDCl<sub>3</sub>): δ = 1.31 (s, 9H), 7.42 (t, *J* = 7.4 Hz, 2H), 7.58–7.49 (m, 8H), 7.72 (d, *J* = 8.2 Hz, 4H), 7.79 (dd, *J* = 8.4, 1.6 Hz, 2H), 7.98–7.91 (m, 3H), 8.00 (d, *J* = 8.4 Hz, 3H), 8.12 (s, 1H), 8.27 (s, 2H), 8.35 (s, 2H). <sup>13</sup>C NMR (100 MHz, CDCl<sub>3</sub>): δ = 148.93, 141.15, 139.80, 139.06, 137.46, 133.74, 132.82, 130.71, 128.84, 128.63, 128.55, 128.24, 127.89, 127.71, 127.43, 127.36, 126.39, 126.17, 126.11, 121.65, 35.51, 31.74. MS: *m/z* calcd. for C<sub>52</sub>H<sub>38</sub> 663.1472; Found 662.4326 [M<sup>+</sup>].

**Synthesis of 7-tert-butyl-5,9-di(phenanthren-9-yl)-1,3-diphenylpyrene (Py-B9Ph):** according to the above method, A mixture of 7-*tert*-butyl-1,3-diphenyl-5,9-dibromopyrene (681 mg, 1.2 mmol), 9-phenanthreneboronic acid (887 mg, 4.0 mmol) and obtained **Py-B9Ph** (439 mg, 49%). MS: *m/z* calcd. for C<sub>60</sub>H<sub>42</sub> 762.3021; Found 762.2671 [M<sup>+</sup>].

**Synthesis of 7-tert-butyl-5,9-di(phenanthren-2-yl)-1,3-diphenylpyrene (Py-B2Ph):** A mixture of 7-*tert*-butyl-1,3-diphenyl-5,9-dibromopyrene (681 mg, 1.2 mmol), 2-phenanthreneboronic acid (887 mg, 4.0 mmol) and obtained **Py-B2Ph** (467 mg, 51%) as a white powder. <sup>1</sup>H NMR (400 MHz, CDCl<sub>3</sub>): δ = 1.31 (s, 9H), 7.43 (t, *J* = 6.8 Hz, 2H), 7.54 (t, *J* = 7.6 Hz, 4H), 7.65 (dd, *J* = 11.4, 4.4 Hz, 2H), 7.78–7.68 (m, 6H), 7.88–7.80 (m, 4H), 8.01–7.92 (m, 4H), 8.04 (s, 1H), 8.18 (d, *J* = 1.7 Hz, 2H), 8.33 (s, 2H), 8.40 (s, 2H), 8.79 (d, *J* = 8.2 Hz, 2H), 8.86 (d, *J* = 8.6 Hz, 2H). <sup>13</sup>C NMR (100

MHz, CDCl<sub>3</sub>):  $\delta$  = 148.99, 141.16, 139.71, 139.61, 137.51, 132.35, 132.25, 130.75, 130.72, 130.33, 129.77, 129.64, 129.03, 128.78, 128.59, 127.50, 127.44, 127.41, 127.16, 126.88, 126.79, 126.12, 124.77, 124.37, 122.87, 122.71, 121.68, 35.55, 31.76. MS: m/z calcd. for C<sub>60</sub>H<sub>42</sub> 762.3458; Found 762.4091 [M<sup>+</sup>].

**Synthesis of 7-tert-butyl-5,9-di(anthracen-2-yl)-1,3-diphenylpyrene (Py-B2An):** A mixture of 7-tert-butyl-1,3-diphenyl-5,9-dibromopyrene (681 mg, 1.2 mmol), 4-methylphenylboronic acid (887 mg, 4.0 mmol) and a yellow powder **Py-2An** was obtained (410 mg, 45%). <sup>1</sup>H NMR (400 MHz, CDCl<sub>3</sub>):  $\delta$  = 1.31 (s, 9H), 7.42 (t,  $J$  = 7.4 Hz, 2H), 7.57–7.47 (m, 8H), 7.81–7.72 (m, 6H), 8.03 (s, 1H), 8.11–8.04 (m, 4H), 8.16 (d,  $J$  = 8.8 Hz, 2H), 8.28 (s, 2H), 8.34 (s, 2H), 8.39 (s, 2H), 8.53 (d,  $J$  = 5.6 Hz, 4H). MS: m/z calcd., for C<sub>60</sub>H<sub>42</sub> 762.3356; Found 762.2873 [M<sup>+</sup>].

### 3. DFT Calculations

**Table S1-1.** Atom coordinates and absolute energies for **Py-BBz** Standard orientation.

| Center Number | Atomic Number | Atomic Type | Coordinates (Angstroms) |           |           |
|---------------|---------------|-------------|-------------------------|-----------|-----------|
|               |               |             | X                       | Y         | Z         |
| 1             | 6             | 0           | 1.442929                | -3.323173 | -0.035289 |
| 2             | 6             | 0           | 0.056822                | -3.140973 | -0.026664 |
| 3             | 6             | 0           | -0.53236                | -1.863258 | -0.006999 |
| 4             | 6             | 0           | 0.298265                | -0.703465 | -0.018004 |
| 5             | 6             | 0           | 1.716827                | -0.880541 | -0.020048 |
| 6             | 6             | 0           | 2.24996                 | -2.176681 | -0.022194 |
| 7             | 6             | 0           | -1.966022               | -1.68969  | 0.037354  |
| 8             | 6             | 0           | -0.274963               | 0.607195  | -0.017895 |
| 9             | 6             | 0           | -1.697425               | 0.755796  | -0.018419 |
| 10            | 6             | 0           | -2.500566               | -0.430246 | 0.032079  |
| 11            | 6             | 0           | -2.254773               | 2.062797  | -0.008691 |
| 12            | 6             | 0           | -1.390439               | 3.160655  | 0.026844  |
| 13            | 6             | 0           | 0.001798                | 3.045967  | 0.007536  |
| 14            | 6             | 0           | 0.581964                | 1.751711  | -0.007142 |
| 15            | 6             | 0           | 1.999934                | 1.53794   | 0.028662  |
| 16            | 6             | 0           | 2.563503                | 0.293166  | 0.00881   |
| 17            | 1             | 0           | 2.651894                | 2.404008  | 0.074544  |
| 18            | 1             | 0           | -0.602207               | -4.000009 | -0.028613 |
| 19            | 1             | 0           | 3.329801                | -2.283644 | -0.015114 |
| 20            | 1             | 0           | -3.578474               | -0.323675 | 0.096625  |
| 21            | 1             | 0           | -1.824555               | 4.15797   | 0.001312  |
| 22            | 6             | 0           | 0.805251                | 4.304251  | -0.014907 |
| 23            | 6             | 0           | 0.605549                | 5.283652  | 0.970492  |
| 24            | 6             | 0           | 1.720253                | 4.576697  | -1.046141 |
| 25            | 6             | 0           | 1.310107                | 6.486523  | 0.93988   |
| 26            | 1             | 0           | -0.098423               | 5.08717   | 1.77702   |
| 27            | 6             | 0           | 2.42374                 | 5.779383  | -1.078741 |
| 28            | 1             | 0           | 1.867121                | 3.842538  | -1.835353 |
| 29            | 6             | 0           | 2.223618                | 6.738811  | -0.084295 |
| 30            | 1             | 0           | 1.145951                | 7.226471  | 1.720949  |
| 31            | 1             | 0           | 3.123281                | 5.971275  | -1.890082 |
| 32            | 1             | 0           | 2.772709                | 7.677736  | -0.110547 |
| 33            | 6             | 0           | -3.719115               | 2.332877  | -0.057828 |
| 34            | 6             | 0           | -4.305997               | 3.207274  | 0.872118  |
| 35            | 6             | 0           | -4.540473               | 1.786362  | -1.059871 |
| 36            | 6             | 0           | -5.664669               | 3.512697  | 0.814116  |
| 37            | 1             | 0           | -3.688646               | 3.631672  | 1.661536  |
| 38            | 6             | 0           | -5.898174               | 2.093209  | -1.120366 |
| 39            | 1             | 0           | -4.101433               | 1.130605  | -1.808439 |



|    |   |   |           |           |           |
|----|---|---|-----------|-----------|-----------|
| 40 | 6 | 0 | -6.467717 | 2.956478  | -0.182326 |
| 41 | 1 | 0 | -6.096969 | 4.184001  | 1.553702  |
| 42 | 1 | 0 | -6.511376 | 1.663753  | -1.910319 |
| 43 | 1 | 0 | -7.528081 | 3.195312  | -0.229941 |
| 44 | 6 | 0 | -2.881489 | -2.873819 | 0.10863   |
| 45 | 6 | 0 | -2.939395 | -3.669806 | 1.262467  |
| 46 | 6 | 0 | -3.719166 | -3.193845 | -0.968964 |
| 47 | 6 | 0 | -3.811756 | -4.755087 | 1.336541  |
| 48 | 1 | 0 | -2.295728 | -3.429795 | 2.106802  |
| 49 | 6 | 0 | -4.591793 | -4.280206 | -0.896681 |
| 50 | 1 | 0 | -3.68016  | -2.585025 | -1.870409 |
| 51 | 6 | 0 | -4.641472 | -5.06392  | 0.256776  |
| 52 | 1 | 0 | -3.84608  | -5.357758 | 2.242197  |
| 53 | 1 | 0 | -5.233684 | -4.51305  | -1.744269 |
| 54 | 1 | 0 | -5.321772 | -5.91116  | 0.314276  |
| 55 | 6 | 0 | 4.055748  | 0.162167  | 0.034765  |
| 56 | 6 | 0 | 4.753243  | -0.331832 | -1.077957 |
| 57 | 6 | 0 | 4.787558  | 0.557257  | 1.163328  |
| 58 | 6 | 0 | 6.144254  | -0.428923 | -1.061837 |
| 59 | 1 | 0 | 4.196393  | -0.638558 | -1.961642 |
| 60 | 6 | 0 | 6.179393  | 0.46087   | 1.180614  |
| 61 | 1 | 0 | 4.256487  | 0.940978  | 2.032357  |
| 62 | 6 | 0 | 6.862309  | -0.03255  | 0.06818   |
| 63 | 1 | 0 | 6.6679    | -0.810753 | -1.9363   |
| 64 | 1 | 0 | 6.729782  | 0.772434  | 2.066376  |
| 65 | 1 | 0 | 7.947687  | -0.108397 | 0.081182  |
| 66 | 6 | 0 | 2.08544   | -4.708078 | -0.060183 |
| 67 | 6 | 0 | 2.944852  | -4.848844 | -1.34076  |
| 68 | 6 | 0 | 2.988402  | -4.89471  | 1.182416  |
| 69 | 6 | 0 | 1.03723   | -5.835064 | -0.05398  |
| 70 | 1 | 0 | 2.330092  | -4.732503 | -2.242848 |
| 71 | 1 | 0 | 3.735944  | -4.08999  | -1.369654 |
| 72 | 1 | 0 | 3.421352  | -5.837202 | -1.378299 |
| 73 | 1 | 0 | 2.405296  | -4.811439 | 2.108978  |
| 74 | 1 | 0 | 3.456715  | -5.8872   | 1.161086  |
| 75 | 1 | 0 | 3.790038  | -4.14672  | 1.217727  |
| 76 | 1 | 0 | 1.540422  | -6.810022 | -0.069815 |
| 77 | 1 | 0 | 0.409714  | -5.793996 | 0.84575   |
| 78 | 1 | 0 | 0.381897  | -5.789173 | -0.933348 |

---

**Table S1-2.** Atom coordinates and absolute energies for **Py-B2Na** Standard orientation.

| Center Number | Atomic Number | Atomic Type | Coordinates (Angstroms) |           |           |
|---------------|---------------|-------------|-------------------------|-----------|-----------|
|               |               |             | X                       | Y         | Z         |
| 1             | 6             | 0           | -3.265985               | -3.096021 | -0.145391 |
| 2             | 6             | 0           | 0.979377                | -2.472284 | -0.033774 |
| 3             | 6             | 0           | 1.111971                | -1.074161 | 0.036503  |
| 4             | 6             | 0           | -0.055249               | -0.254681 | -0.027721 |
| 5             | 6             | 0           | -1.333884               | -0.884834 | -0.145552 |
| 6             | 6             | 0           | -1.405053               | -2.283096 | -0.201848 |
| 7             | 6             | 0           | 2.407467                | -0.436716 | 0.158356  |
| 8             | 6             | 0           | 0.052237                | 1.167416  | 0.012139  |
| 9             | 6             | 0           | 1.338341                | 1.776385  | 0.120229  |
| 10            | 6             | 0           | 2.492097                | 0.92863   | 0.192934  |
| 11            | 6             | 0           | 1.433691                | 3.186786  | 0.157483  |
| 12            | 6             | 0           | 0.263365                | 3.948219  | 0.084696  |
| 13            | 6             | 0           | -1.008638               | 3.375988  | -0.024672 |
| 14            | 6             | 0           | -1.126732               | 1.968297  | -0.063089 |
| 15            | 6             | 0           | -2.395912               | 1.308787  | -0.17438  |
| 16            | 6             | 0           | -2.519864               | -0.052493 | -0.211515 |
| 17            | 1             | 0           | -3.290884               | 1.923042  | -0.224251 |
| 18            | 1             | 0           | 1.883964                | -3.066764 | -0.005214 |
| 19            | 1             | 0           | -2.384901               | -2.742286 | -0.303753 |
| 20            | 1             | 0           | 3.468585                | 1.395492  | 0.287508  |
| 21            | 1             | 0           | 0.345334                | 5.032602  | 0.113003  |
| 22            | 6             | 0           | -2.204747               | 4.272284  | -0.10027  |
| 23            | 6             | 0           | -2.656279               | 4.763185  | -1.335002 |
| 24            | 6             | 0           | -2.882864               | 4.664513  | 1.064063  |
| 25            | 6             | 0           | -3.752026               | 5.624007  | -1.403796 |
| 26            | 1             | 0           | -2.139532               | 4.465531  | -2.244863 |
| 27            | 6             | 0           | -3.978886               | 5.525124  | 0.996547  |
| 28            | 1             | 0           | -2.543341               | 4.289642  | 2.027179  |
| 29            | 6             | 0           | -4.41621                | 6.008482  | -0.237782 |
| 30            | 1             | 0           | -4.085704               | 5.995064  | -2.370366 |
| 31            | 1             | 0           | -4.49035                | 5.818522  | 1.910627  |
| 32            | 1             | 0           | -5.270068               | 6.67997   | -0.290822 |
| 33            | 6             | 0           | 2.75132                 | 3.887131  | 0.271502  |
| 34            | 6             | 0           | 3.282654                | 4.216362  | 1.52796   |
| 35            | 6             | 0           | 3.470029                | 4.255348  | -0.876197 |
| 36            | 6             | 0           | 4.495868                | 4.896951  | 1.634171  |
| 37            | 1             | 0           | 2.735625                | 3.935038  | 2.42519   |
| 38            | 6             | 0           | 4.683253                | 4.936208  | -0.771285 |
| 39            | 1             | 0           | 3.069041                | 4.004863  | -1.85596  |
| 40            | 6             | 0           | 5.199493                | 5.260009  | 0.484538  |
| 41            | 1             | 0           | 4.890448                | 5.14424   | 2.61722   |

|    |   |   |           |           |           |
|----|---|---|-----------|-----------|-----------|
| 42 | 1 | 0 | 5.224425  | 5.214574  | -1.672904 |
| 43 | 1 | 0 | 6.14492   | 5.7912    | 0.566879  |
| 44 | 6 | 0 | -3.87957  | -0.664529 | -0.332366 |
| 45 | 6 | 0 | -4.467766 | -1.321551 | 0.733045  |
| 46 | 6 | 0 | -4.605199 | -0.554527 | -1.552692 |
| 47 | 6 | 0 | -5.769552 | -1.878734 | 0.639626  |
| 48 | 1 | 0 | -3.926372 | -1.411402 | 1.673377  |
| 49 | 6 | 0 | -5.869005 | -1.083306 | -1.677022 |
| 50 | 1 | 0 | -4.142623 | -0.039955 | -2.391613 |
| 51 | 6 | 0 | -6.385077 | -2.550801 | 1.729848  |
| 52 | 6 | 0 | -6.489919 | -1.758265 | -0.593541 |
| 53 | 1 | 0 | -6.410255 | -0.987584 | -2.616626 |
| 54 | 6 | 0 | -7.649891 | -3.080751 | 1.608858  |
| 55 | 1 | 0 | -5.837629 | -2.640216 | 2.666355  |
| 56 | 6 | 0 | -7.792808 | -2.316122 | -0.685392 |
| 57 | 6 | 0 | -8.360915 | -2.962629 | 0.389253  |
| 58 | 1 | 0 | -8.108052 | -3.592977 | 2.451737  |
| 59 | 1 | 0 | -8.337349 | -2.223338 | -1.623357 |
| 60 | 1 | 0 | -9.359454 | -3.38513  | 0.305018  |
| 61 | 6 | 0 | 3.655482  | -1.253769 | 0.255754  |
| 62 | 6 | 0 | 4.70254   | -1.062345 | -0.62579  |
| 63 | 6 | 0 | 3.797291  | -2.228852 | 1.285637  |
| 64 | 6 | 0 | 5.908049  | -1.80559  | -0.526052 |
| 65 | 1 | 0 | 4.60665   | -0.322693 | -1.418673 |
| 66 | 6 | 0 | 4.952287  | -2.964234 | 1.411617  |
| 67 | 1 | 0 | 2.976073  | -2.3785   | 1.98284   |
| 68 | 6 | 0 | 6.990188  | -1.615865 | -1.426533 |
| 69 | 6 | 0 | 6.039333  | -2.779769 | 0.516434  |
| 70 | 1 | 0 | 5.047483  | -3.697984 | 2.210106  |
| 71 | 6 | 0 | 8.147764  | -2.351415 | -1.304049 |
| 72 | 1 | 0 | 6.889054  | -0.875654 | -2.218097 |
| 73 | 6 | 0 | 7.246163  | -3.521314 | 0.615906  |
| 74 | 6 | 0 | 8.277393  | -3.31344  | -0.272723 |
| 75 | 1 | 0 | 8.968081  | -2.195012 | -2.000731 |
| 76 | 1 | 0 | 7.343327  | -4.25996  | 1.409576  |
| 77 | 1 | 0 | 9.19618   | -3.88864  | -0.185131 |
| 78 | 6 | 0 | -0.437195 | -4.616113 | -0.223929 |
| 79 | 6 | 0 | -1.376908 | -5.086352 | 0.913846  |
| 80 | 6 | 0 | -1.076956 | -4.979305 | -1.583233 |
| 81 | 6 | 0 | 0.888966  | -5.389109 | -0.094846 |
| 82 | 1 | 0 | -0.948957 | -4.847505 | 1.895727  |
| 83 | 1 | 0 | -2.36097  | -4.60837  | 0.848973  |
| 84 | 1 | 0 | -1.525541 | -6.172958 | 0.859739  |
| 85 | 1 | 0 | -0.437499 | -4.658235 | -2.415416 |

|    |   |   |           |           |           |
|----|---|---|-----------|-----------|-----------|
| 86 | 1 | 0 | -1.220293 | -6.065312 | -1.659666 |
| 87 | 1 | 0 | -2.055598 | -4.498165 | -1.706772 |
| 88 | 1 | 0 | 0.700547  | -6.463944 | -0.208754 |
| 89 | 1 | 0 | 1.609606  | -5.095097 | -0.86772  |
| 90 | 1 | 0 | 1.354864  | -5.234924 | 0.886616  |

**Table S1-3.** Atom coordinates and absolute energies for **Py-B9Ph** Standard orientation.

| Center Number | Atomic Number | Atomic Type | Coordinates (Angstroms) |           |           |
|---------------|---------------|-------------|-------------------------|-----------|-----------|
|               |               |             | X                       | Y         | Z         |
| 1             | 6             | 0           | -3.619366               | 375239 0. | 497490    |
| 2             | 6             | 0           | 0.683858                | -2.882923 | 0.584999  |
| 3             | 6             | 0           | 1.008751                | -1.485877 | 0.536943  |
| 4             | 6             | 0           | -0.109766               | -0.567737 | 0.356116  |
| 5             | 6             | 0           | -1.462845               | -1.085312 | 0.267163  |
| 6             | 6             | 0           | -1.658941               | -2.475821 | 0.352472  |
| 7             | 6             | 0           | 2.456712                | -0.930151 | 0.633951  |
| 8             | 6             | 0           | 0.099936                | 0.852099  | 0.256542  |
| 9             | 6             | 0           | 1.411281                | 1.376135  | 0.313642  |
| 10            | 6             | 0           | 2.50901                 | 0.479565  | 0.481359  |
| 11            | 6             | 0           | 1.613984                | 2.771167  | 0.202215  |
| 12            | 6             | 0           | 0.529924                | 3.627975  | 0.038976  |
| 13            | 6             | 0           | -0.767295               | 3.133895  | -0.018732 |
| 14            | 6             | 0           | -0.998104               | 1.739348  | 0.087516  |
| 15            | 6             | 0           | -2.318523               | 1.189868  | 0.021753  |
| 16            | 6             | 0           | -2.602719               | -0.174549 | 0.097079  |
| 17            | 1             | 0           | -3.107749               | 1.904803  | -0.121717 |
| 18            | 1             | 0           | 1.479771                | -3.597418 | 0.691584  |
| 19            | 1             | 0           | -2.661994               | -2.870319 | 0.296713  |
| 20            | 1             | 0           | 3.48018                 | 0.961852  | 0.519806  |
| 21            | 1             | 0           | 0.700402                | 4.700657  | -0.045154 |
| 22            | 6             | 0           | 3.01225                 | 3.351308  | 0.259572  |
| 23            | 6             | 0           | 3.571222                | 3.731334  | 1.485534  |
| 24            | 6             | 0           | 3.757486                | 3.51389   | -0.915023 |
| 25            | 6             | 0           | 4.860508                | 4.267487  | 1.536118  |
| 26            | 1             | 0           | 2.996952                | 3.607089  | 2.402433  |
| 27            | 6             | 0           | 5.046385                | 4.050561  | -0.863101 |
| 28            | 1             | 0           | 3.327515                | 3.220426  | -1.871752 |
| 29            | 6             | 0           | 5.598457                | 4.427828  | 0.362369  |
| 30            | 1             | 0           | 5.289908                | 4.561002  | 2.493504  |
| 31            | 1             | 0           | 5.621107                | 4.175082  | -1.780469 |
| 32            | 1             | 0           | 6.603886                | 4.845689  | 0.402369  |
| 33            | 6             | 0           | -1.913233               | 4.109188  | -0.199241 |
| 34            | 6             | 0           | -2.354038               | 4.454231  | -1.482605 |

|    |   |   |           |           |           |
|----|---|---|-----------|-----------|-----------|
| 35 | 6 | 0 | -2.53909  | 4.678271  | 0.917294  |
| 36 | 6 | 0 | -3.408255 | 5.356311  | -1.64706  |
| 37 | 1 | 0 | -1.871723 | 4.015831  | -2.354956 |
| 38 | 6 | 0 | -3.592636 | 5.581269  | 0.751222  |
| 39 | 1 | 0 | -2.199622 | 4.415338  | 1.918466  |
| 40 | 6 | 0 | -4.02765  | 5.920574  | -0.530866 |
| 41 | 1 | 0 | -3.746594 | 5.619959  | -2.648559 |
| 42 | 1 | 0 | -4.074643 | 6.021433  | 1.623852  |
| 43 | 1 | 0 | -4.849561 | 6.623957  | -0.659846 |
| 44 | 6 | 0 | -7.211314 | -3.774271 | -2.003699 |
| 45 | 6 | 0 | -5.942547 | -3.283563 | -1.771811 |
| 46 | 6 | 0 | -5.741227 | -2.131278 | -0.97157  |
| 47 | 6 | 0 | -6.850152 | -1.471447 | -0.40257  |
| 48 | 6 | 0 | -8.142653 | -1.995154 | -0.654901 |
| 49 | 6 | 0 | -8.321154 | -3.120828 | -1.437547 |
| 50 | 6 | 0 | -4.420735 | -1.624926 | -0.734592 |
| 51 | 6 | 0 | -6.614719 | -0.291992 | 0.409511  |
| 52 | 6 | 0 | -5.281767 | 0.199987  | 0.631508  |
| 53 | 6 | 0 | -4.12951  | -0.487283 | 0.039483  |
| 54 | 6 | 0 | -5.132247 | 1.357878  | 1.454082  |
| 55 | 1 | 0 | -4.141936 | 1.742823  | 1.650535  |
| 56 | 6 | 0 | -6.21672  | 2.000208  | 2.014841  |
| 57 | 6 | 0 | -7.510418 | 1.518027  | 1.785126  |
| 58 | 6 | 0 | -7.698834 | 0.400306  | 1.003729  |
| 59 | 1 | 0 | -3.6342   | -2.173321 | -1.218426 |
| 60 | 1 | 0 | -7.359855 | -4.660542 | -2.619798 |
| 61 | 1 | 0 | -5.07268  | -3.779098 | -2.204122 |
| 62 | 1 | 0 | -9.017989 | -1.510048 | -0.230867 |
| 63 | 1 | 0 | -9.323767 | -3.506229 | -1.619679 |
| 64 | 1 | 0 | -6.071833 | 2.881572  | 2.637535  |
| 65 | 1 | 0 | -8.365042 | 2.027431  | 2.22929   |
| 66 | 1 | 0 | -8.713025 | 0.044375  | 0.845354  |
| 67 | 6 | 0 | -0.988771 | -4.899455 | 0.550305  |
| 68 | 6 | 0 | -1.917378 | -5.115923 | 1.755837  |
| 69 | 6 | 0 | -1.693162 | -5.256827 | -0.767972 |
| 70 | 6 | 0 | 0.269277  | -5.763678 | 0.705709  |
| 71 | 1 | 0 | -1.411385 | -4.841084 | 2.694139  |
| 72 | 1 | 0 | -2.828703 | -4.506945 | 1.670528  |
| 73 | 1 | 0 | -2.221629 | -6.17279  | 1.828268  |
| 74 | 1 | 0 | -1.027912 | -5.080797 | -1.627106 |
| 75 | 1 | 0 | -1.989403 | -6.31837  | -0.776414 |
| 76 | 1 | 0 | -2.60057  | -4.651869 | -0.910428 |
| 77 | 1 | 0 | -0.001204 | -6.830942 | 0.740183  |
| 78 | 1 | 0 | 0.95874   | -5.617901 | -0.138292 |

|     |   |   |           |           |           |
|-----|---|---|-----------|-----------|-----------|
| 79  | 1 | 0 | 0.806979  | -5.524737 | 1.630394  |
| 80  | 6 | 0 | 8.877871  | -2.723357 | 1.431175  |
| 81  | 6 | 0 | 7.555123  | -2.626268 | 1.816524  |
| 82  | 6 | 0 | 6.579714  | -2.03867  | 0.969479  |
| 83  | 6 | 0 | 6.976064  | -1.547271 | -0.274741 |
| 84  | 6 | 0 | 8.335008  | -1.653296 | -0.661228 |
| 85  | 6 | 0 | 9.270194  | -2.23065  | 0.17481   |
| 86  | 6 | 0 | 5.192591  | -1.960157 | 1.413206  |
| 87  | 6 | 0 | 5.962126  | -0.955145 | -1.084897 |
| 88  | 6 | 0 | 4.610449  | -0.872649 | -0.619964 |
| 89  | 6 | 0 | 4.061494  | -1.338043 | 0.647931  |
| 90  | 6 | 0 | 3.652272  | -0.264031 | -1.479165 |
| 91  | 1 | 0 | 2.622738  | -0.197675 | -1.131119 |
| 92  | 6 | 0 | 3.98559   | 0.235383  | -2.719687 |
| 93  | 6 | 0 | 5.310244  | 0.15015   | -3.165675 |
| 94  | 6 | 0 | 6.269651  | -0.430145 | -2.365013 |
| 95  | 1 | 0 | 5.190789  | -2.368503 | 2.367835  |
| 96  | 1 | 0 | 9.61693   | -3.176971 | 2.090888  |
| 97  | 1 | 0 | 7.239795  | -3.003594 | 2.788603  |
| 98  | 1 | 0 | 8.658812  | -1.275271 | -1.627536 |
| 99  | 1 | 0 | 10.312218 | -2.30399  | -0.134315 |
| 100 | 1 | 0 | 3.22836   | 0.69503   | -3.353399 |
| 101 | 1 | 0 | 5.578043  | 0.544435  | -4.145309 |
| 102 | 1 | 0 | 7.289932  | -0.482356 | -2.73455  |

**Table S1-4.** Atom coordinates and absolute energies for **Py-B2Ph** Standard orientation.

| Center Number | Atomic Number | Atomic Type | Coordinates (Angstroms) |           |           |
|---------------|---------------|-------------|-------------------------|-----------|-----------|
|               |               |             | X                       | Y         | Z         |
| 1             | 6             | 0           | 0.002799                | -3.027544 | -0.009854 |
| 2             | 6             | 0           | -1.182902               | -2.325275 | -0.004401 |
| 3             | 6             | 0           | -1.25776                | -0.936593 | -0.004147 |
| 4             | 6             | 0           | 0.000563                | -0.229527 | -0.005242 |
| 5             | 6             | 0           | 1.259914                | -0.934779 | -0.004481 |
| 6             | 6             | 0           | 1.187405                | -2.323523 | -0.00469  |
| 7             | 6             | 0           | -2.543463               | -0.1804   | -0.003194 |
| 8             | 6             | 0           | -0.000414               | 1.198714  | -0.004188 |
| 9             | 6             | 0           | -1.212421               | 1.903849  | -0.002608 |
| 10            | 6             | 0           | -2.433964               | 1.166872  | -0.002112 |
| 11            | 6             | 0           | -1.208871               | 3.305368  | -0.001209 |
| 12            | 6             | 0           | -0.002284               | 3.984304  | -0.001    |
| 13            | 6             | 0           | 1.205241                | 3.30696   | -0.001732 |
| 14            | 6             | 0           | 1.210678                | 1.905491  | -0.003107 |
| 15            | 6             | 0           | 2.433265                | 1.170186  | -0.002962 |

|    |   |   |           |           |           |
|----|---|---|-----------|-----------|-----------|
| 16 | 6 | 0 | 2.544593  | -0.176947 | -0.003842 |
| 17 | 1 | 0 | 3.290956  | 1.790629  | -0.002623 |
| 18 | 1 | 0 | -2.062246 | -2.90347  | 0.002269  |
| 19 | 1 | 0 | 2.067899  | -2.900141 | 0.001862  |
| 20 | 1 | 0 | -3.292682 | 1.78601   | -0.001261 |
| 21 | 1 | 0 | -0.00298  | 5.062115  | 0.000216  |
| 22 | 6 | 0 | 2.487247  | 4.100023  | -0.000721 |
| 23 | 6 | 0 | 3.08451   | 4.47312   | 1.198426  |
| 24 | 6 | 0 | 3.084087  | 4.476519  | -1.199258 |
| 25 | 6 | 0 | 4.261523  | 5.207609  | 1.19953   |
| 26 | 1 | 0 | 2.628289  | 4.18621   | 2.1323    |
| 27 | 6 | 0 | 4.260801  | 5.211038  | -1.198845 |
| 28 | 1 | 0 | 2.627169  | 4.192256  | -2.133591 |
| 29 | 6 | 0 | 4.851922  | 5.577316  | 0.000814  |
| 30 | 1 | 0 | 4.716589  | 5.490981  | 2.135323  |
| 31 | 1 | 0 | 4.715459  | 5.497275  | -2.133955 |
| 32 | 1 | 0 | 5.766564  | 6.148791  | 0.001279  |
| 33 | 6 | 0 | -2.491965 | 4.096662  | 0.000364  |
| 34 | 6 | 0 | -3.090413 | 4.471744  | -1.197569 |
| 35 | 6 | 0 | -3.088646 | 4.46953   | 1.200115  |
| 36 | 6 | 0 | -4.268433 | 5.204614  | -1.196297 |
| 37 | 1 | 0 | -2.634325 | 4.187646  | -2.132367 |
| 38 | 6 | 0 | -4.266374 | 5.202422  | 1.202078  |
| 39 | 1 | 0 | -2.630807 | 4.183717  | 2.133524  |
| 40 | 6 | 0 | -4.858669 | 5.570696  | 0.003608  |
| 41 | 1 | 0 | -4.724417 | 5.489545  | -2.131168 |
| 42 | 1 | 0 | -4.720896 | 5.485849  | 2.13811   |
| 43 | 1 | 0 | -5.774098 | 6.140907  | 0.004991  |
| 44 | 6 | 0 | 0.003609  | -4.57758  | 0.021052  |
| 45 | 6 | 0 | 0.008849  | -5.041503 | 1.491374  |
| 46 | 1 | 0 | -0.864833 | -4.671374 | 2.01207   |
| 47 | 1 | 0 | 0.006581  | -6.124166 | 1.545382  |
| 48 | 1 | 0 | 0.888649  | -4.675472 | 2.004656  |
| 49 | 6 | 0 | -1.242864 | -5.152705 | -0.684085 |
| 50 | 1 | 0 | -1.138413 | -6.224559 | -0.791319 |
| 51 | 1 | 0 | -2.144181 | -4.970728 | -0.115475 |
| 52 | 1 | 0 | -1.36452  | -4.722261 | -1.669647 |
| 53 | 6 | 0 | 1.245596  | -5.151488 | -0.692382 |
| 54 | 1 | 0 | 1.348843  | -4.735084 | -1.686135 |
| 55 | 1 | 0 | 2.153161  | -4.952264 | -0.140047 |
| 56 | 1 | 0 | 1.149937  | -6.225849 | -0.781351 |
| 57 | 6 | 0 | -4.008063 | -0.752099 | -0.004708 |
| 58 | 6 | 0 | -5.100934 | 0.108652  | 0.002942  |
| 59 | 6 | 0 | -4.378998 | -2.116683 | -0.014255 |

|     |   |   |            |           |           |
|-----|---|---|------------|-----------|-----------|
| 60  | 6 | 0 | -6.441118  | -0.308242 | 0.002153  |
| 61  | 1 | 0 | -4.988103  | 1.167903  | 0.010402  |
| 62  | 6 | 0 | -5.678397  | -2.552119 | -0.015323 |
| 63  | 1 | 0 | -3.659133  | -2.890081 | -0.022844 |
| 64  | 6 | 0 | -6.762497  | -1.668954 | -0.006985 |
| 65  | 6 | 0 | -7.496702  | 0.672     | 0.010424  |
| 66  | 1 | 0 | -5.847293  | -3.614832 | -0.023479 |
| 67  | 6 | 0 | -8.158495  | -2.083258 | -0.007987 |
| 68  | 6 | 0 | -8.784459  | 0.298054  | 0.008925  |
| 69  | 1 | 0 | -7.225731  | 1.716427  | 0.017664  |
| 70  | 6 | 0 | -9.157678  | -1.09328  | -0.000372 |
| 71  | 6 | 0 | -8.561851  | -3.434104 | -0.016102 |
| 72  | 1 | 0 | -9.570872  | 1.036594  | 0.014892  |
| 73  | 6 | 0 | -10.514562 | -1.469639 | -0.001917 |
| 74  | 6 | 0 | -9.887324  | -3.779737 | -0.016794 |
| 75  | 1 | 0 | -7.824569  | -4.217927 | -0.021845 |
| 76  | 6 | 0 | -10.878283 | -2.788586 | -0.009789 |
| 77  | 1 | 0 | -11.268148 | -0.69743  | 0.003455  |
| 78  | 1 | 0 | -10.1712   | -4.820116 | -0.022772 |
| 79  | 1 | 0 | -11.919632 | -3.068536 | -0.010588 |
| 80  | 6 | 0 | 4.009476   | -0.748141 | -0.005327 |
| 81  | 6 | 0 | 5.102846   | 0.112049  | 0.001645  |
| 82  | 6 | 0 | 4.379733   | -2.112892 | -0.014    |
| 83  | 6 | 0 | 6.442793   | -0.305626 | 0.001005  |
| 84  | 1 | 0 | 4.990844   | 1.171336  | 0.008639  |
| 85  | 6 | 0 | 5.678868   | -2.54909  | -0.015192 |
| 86  | 1 | 0 | 3.659273   | -2.885848 | -0.021692 |
| 87  | 6 | 0 | 6.763444   | -1.666519 | -0.007564 |
| 88  | 6 | 0 | 7.498914   | 0.674036  | 0.00958   |
| 89  | 1 | 0 | 5.847157   | -3.611906 | -0.022485 |
| 90  | 6 | 0 | 8.159214   | -2.081588 | -0.008032 |
| 91  | 6 | 0 | 8.786464   | 0.299375  | 0.009999  |
| 92  | 1 | 0 | 7.228515   | 1.718619  | 0.015869  |
| 93  | 6 | 0 | 9.15893    | -1.092164 | 0.001207  |
| 94  | 6 | 0 | 8.561837   | -3.432643 | -0.017477 |
| 95  | 1 | 0 | 9.573276   | 1.037484  | 0.016703  |
| 96  | 6 | 0 | 10.515606  | -1.469275 | 0.001751  |
| 97  | 6 | 0 | 9.887121   | -3.779002 | -0.017469 |
| 98  | 1 | 0 | 7.824131   | -4.216053 | -0.024987 |
| 99  | 6 | 0 | 10.878613  | -2.788409 | -0.007584 |
| 100 | 1 | 0 | 11.269608  | -0.697491 | 0.009446  |
| 101 | 1 | 0 | 10.170435  | -4.819523 | -0.025112 |
| 102 | 1 | 0 | 11.919809  | -3.068931 | -0.007445 |

---



**Table S1-5.** Atom coordinates and absolute energies for **Py-B2An** Standard orientation.

| Center Number | Atomic Number | Atomic Type | Coordinates (Angstroms) |           |           |
|---------------|---------------|-------------|-------------------------|-----------|-----------|
|               |               |             | X                       | Y         | Z         |
| 1             | 6             | 0           | -2.606992               | .379619   | -0.072545 |
| 2             | 6             | 0           | -1.662593               | -1.532482 | 0.007354  |
| 3             | 6             | 0           | -1.535769               | -0.150861 | 0.030619  |
| 4             | 6             | 0           | -0.167305               | 0.378318  | -0.016473 |
| 5             | 6             | 0           | 1.031749                | -0.50527  | -0.081462 |
| 6             | 6             | 0           | 0.679966                | -1.868254 | -0.119463 |
| 7             | 6             | 0           | -2.746263               | 0.722708  | 0.099715  |
| 8             | 6             | 0           | -0.016456               | 1.783369  | -0.002937 |
| 9             | 6             | 0           | -1.145987               | 2.632968  | 0.062899  |
| 10            | 6             | 0           | -2.434705               | 2.075164  | 0.113284  |
| 11            | 6             | 0           | -0.983613               | 4.037995  | 0.073708  |
| 12            | 6             | 0           | 0.306804                | 4.558956  | 0.017652  |
| 13            | 6             | 0           | 1.43629                 | 3.743004  | -0.048478 |
| 14            | 6             | 0           | 1.263236                | 2.340583  | -0.059452 |
| 15            | 6             | 0           | 2.382959                | 1.503427  | -0.118674 |
| 16            | 6             | 0           | 2.460098                | 0.101095  | -0.126394 |
| 17            | 1             | 0           | 3.257319                | 2.091718  | -0.134069 |
| 18            | 1             | 0           | -2.628171               | -1.99337  | 0.047495  |
| 19            | 1             | 0           | 1.398775                | -2.59906  | -0.206732 |
| 20            | 1             | 0           | -3.18622                | 2.822643  | 0.15376   |
| 21            | 1             | 0           | 0.438404                | 5.638735  | 0.025805  |
| 22            | 6             | 0           | 2.785091                | 4.376926  | -0.103769 |
| 23            | 6             | 0           | 3.483749                | 4.689008  | 1.075827  |
| 24            | 6             | 0           | 3.372841                | 4.71792   | -1.33431  |
| 25            | 6             | 0           | 4.726089                | 5.320434  | 1.026733  |
| 26            | 1             | 0           | 3.040396                | 4.432898  | 2.03563   |
| 27            | 6             | 0           | 4.615414                | 5.349006  | -1.383952 |
| 28            | 1             | 0           | 2.843523                | 4.48433   | -2.255356 |
| 29            | 6             | 0           | 5.296636                | 5.652745  | -0.203626 |
| 30            | 1             | 0           | 5.247137                | 5.554132  | 1.952331  |
| 31            | 1             | 0           | 5.049706                | 5.604998  | -2.347507 |
| 32            | 1             | 0           | 6.264827                | 6.145947  | -0.242203 |
| 33            | 6             | 0           | -2.142702               | 4.974401  | 0.141275  |
| 34            | 6             | 0           | -2.746304               | 5.460473  | -1.031764 |
| 35            | 6             | 0           | -2.633122               | 5.42796   | 1.378038  |
| 36            | 6             | 0           | -3.802621               | 6.368725  | -0.970244 |
| 37            | 1             | 0           | -2.376178               | 5.119866  | -1.996322 |
| 38            | 6             | 0           | -3.689569               | 6.335957  | 1.440088  |
| 39            | 1             | 0           | -2.175095               | 5.061978  | 2.294239  |
| 40            | 6             | 0           | -4.278235               | 6.809825  | 0.26621   |

|    |   |   |           |           |           |
|----|---|---|-----------|-----------|-----------|
| 41 | 1 | 0 | -4.252562 | 6.732895  | -1.890973 |
| 42 | 1 | 0 | -4.050919 | 6.674317  | 2.408372  |
| 43 | 1 | 0 | -5.10116  | 7.518757  | 0.314417  |
| 44 | 6 | 0 | 3.965573  | -0.438493 | -0.158389 |
| 45 | 6 | 0 | 5.052329  | 0.473103  | -0.617885 |
| 46 | 6 | 0 | 4.587108  | -1.664586 | 0.18275   |
| 47 | 6 | 0 | 6.382435  | 0.195562  | -0.711206 |
| 48 | 1 | 0 | 4.855981  | 1.464247  | -0.941287 |
| 49 | 6 | 0 | 5.976676  | -1.998157 | 0.103277  |
| 50 | 1 | 0 | 4.083648  | -2.485609 | 0.573887  |
| 51 | 6 | 0 | 6.928718  | -1.05151  | -0.359964 |
| 52 | 1 | 0 | 7.050798  | 0.974214  | -1.074872 |
| 53 | 6 | 0 | 6.431476  | -3.266904 | 0.483961  |
| 54 | 6 | 0 | 8.279104  | -1.380221 | -0.435948 |
| 55 | 6 | 0 | 7.786225  | -3.622395 | 0.416155  |
| 56 | 1 | 0 | 5.713455  | -4.003681 | 0.842594  |
| 57 | 6 | 0 | 8.742636  | -2.648701 | -0.059515 |
| 58 | 1 | 0 | 8.990725  | -0.637145 | -0.793932 |
| 59 | 6 | 0 | 8.26043   | -4.912875 | 0.798353  |
| 60 | 6 | 0 | 10.118218 | -3.016732 | -0.12506  |
| 61 | 6 | 0 | 9.593576  | -5.22929  | 0.719067  |
| 62 | 1 | 0 | 7.541042  | -5.64675  | 1.156628  |
| 63 | 6 | 0 | 10.534048 | -4.269518 | 0.251636  |
| 64 | 1 | 0 | 10.837358 | -2.282374 | -0.482755 |
| 65 | 1 | 0 | 9.935686  | -6.217931 | 1.015247  |
| 66 | 1 | 0 | 11.587501 | -4.532339 | 0.193664  |
| 67 | 6 | 0 | -4.210606 | 0.227552  | 0.138393  |
| 68 | 6 | 0 | -5.38948  | 1.084093  | 0.377768  |
| 69 | 6 | 0 | -4.608057 | -1.09899  | -0.05117  |
| 70 | 6 | 0 | -6.683828 | 0.650346  | 0.412657  |
| 71 | 1 | 0 | -5.309588 | 2.134167  | 0.549286  |
| 72 | 6 | 0 | -5.946991 | -1.596454 | -0.023522 |
| 73 | 1 | 0 | -3.912335 | -1.887724 | -0.249404 |
| 74 | 6 | 0 | -7.040715 | -0.70676  | 0.216083  |
| 75 | 1 | 0 | -7.471563 | 1.377963  | 0.600224  |
| 76 | 6 | 0 | -6.218851 | -2.954895 | -0.228567 |
| 77 | 6 | 0 | -8.346203 | -1.192163 | 0.242875  |
| 78 | 6 | 0 | -7.526012 | -3.459607 | -0.203968 |
| 79 | 1 | 0 | -5.39311  | -3.64165  | -0.411597 |
| 80 | 6 | 0 | -8.625186 | -2.551072 | 0.039176  |
| 81 | 1 | 0 | -9.168432 | -0.501561 | 0.426232  |
| 82 | 6 | 0 | -7.816645 | -4.841761 | -0.409258 |
| 83 | 6 | 0 | -9.951353 | -3.074355 | 0.061545  |
| 84 | 6 | 0 | -9.107554 | -5.305747 | -0.378455 |

|     |   |   |            |           |           |
|-----|---|---|------------|-----------|-----------|
| 85  | 1 | 0 | -6.990245  | -5.525849 | -0.592243 |
| 86  | 6 | 0 | -10.188165 | -4.411042 | -0.14011  |
| 87  | 1 | 0 | -10.777938 | -2.390427 | 0.244098  |
| 88  | 1 | 0 | -9.308815  | -6.362314 | -0.537474 |
| 89  | 1 | 0 | -11.206559 | -4.791264 | -0.118271 |
| 90  | 6 | 0 | -0.846909  | -3.861846 | -0.112732 |
| 91  | 6 | 0 | -0.268826  | -4.465727 | -1.423544 |
| 92  | 6 | 0 | -0.151363  | -4.552387 | 1.094642  |
| 93  | 6 | 0 | -2.348021  | -4.204497 | -0.054583 |
| 94  | 1 | 0 | -0.744804  | -4.020588 | -2.306973 |
| 95  | 1 | 0 | 0.813513   | -4.306038 | -1.517587 |
| 96  | 1 | 0 | -0.448078  | -5.547217 | -1.447276 |
| 97  | 1 | 0 | -0.542299  | -4.170425 | 2.046619  |
| 98  | 1 | 0 | -0.331219  | -5.633397 | 1.060097  |
| 99  | 1 | 0 | 0.934859   | -4.396215 | 1.100727  |
| 100 | 1 | 0 | -2.464088  | -5.292989 | -0.087566 |
| 101 | 1 | 0 | -2.817697  | -3.850634 | 0.875234  |
| 102 | 1 | 0 | -2.902401  | -3.78797  | -0.90811  |

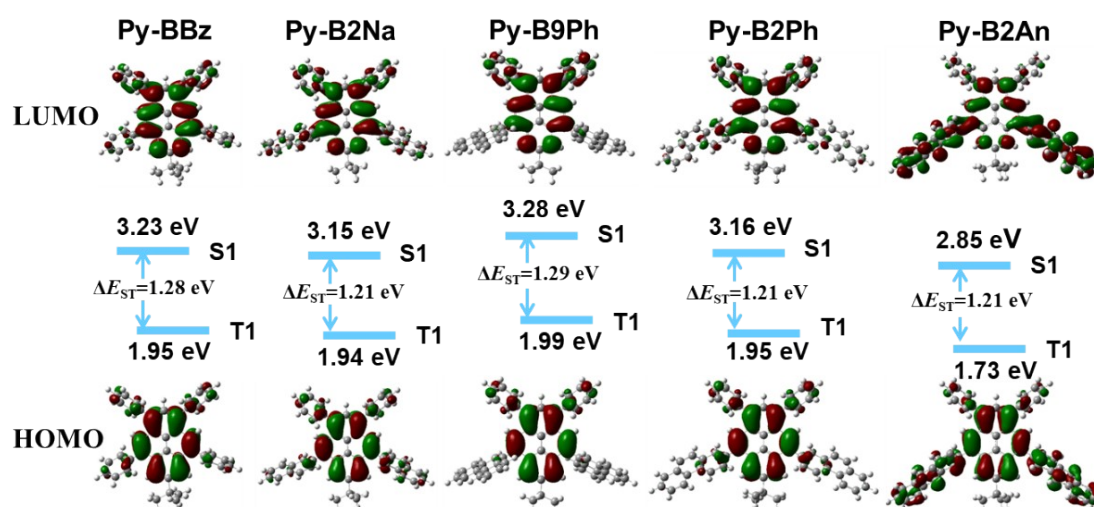

**Figure S1.** Frontier orbital distributions and energy levels of **Py-BBz**, **Py-B2Na**, **Py-B9Ph**, **Py-B2Ph** and **Py-B2An** calculated by DFT and TD-DFT/B3LYP/6-31G(d,p)functions.

## 4. Photophysical Properties

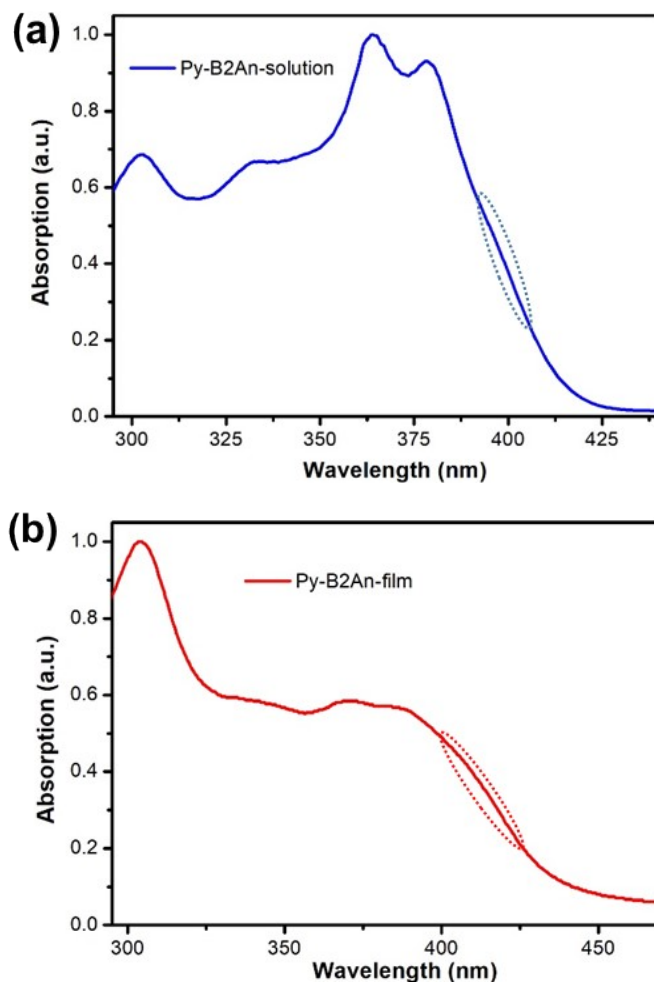

**Figure S2.** Normalized absorption spectra of Py-B2An: (a) in solution and (b) in film.

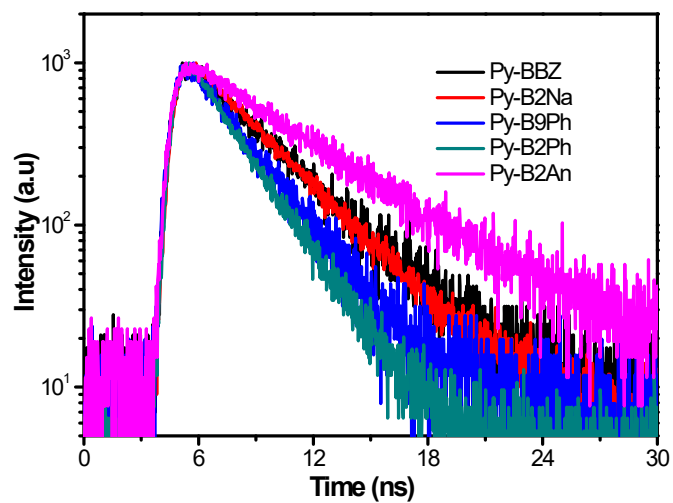

**Figure S3.** The decay profiles of the fluorescence lifetime of compounds Py-BBz, Py-B2Na, Py-B9Ph, Py-B2Ph and Py-B2An in toluene solution.

## 5. Device Performance

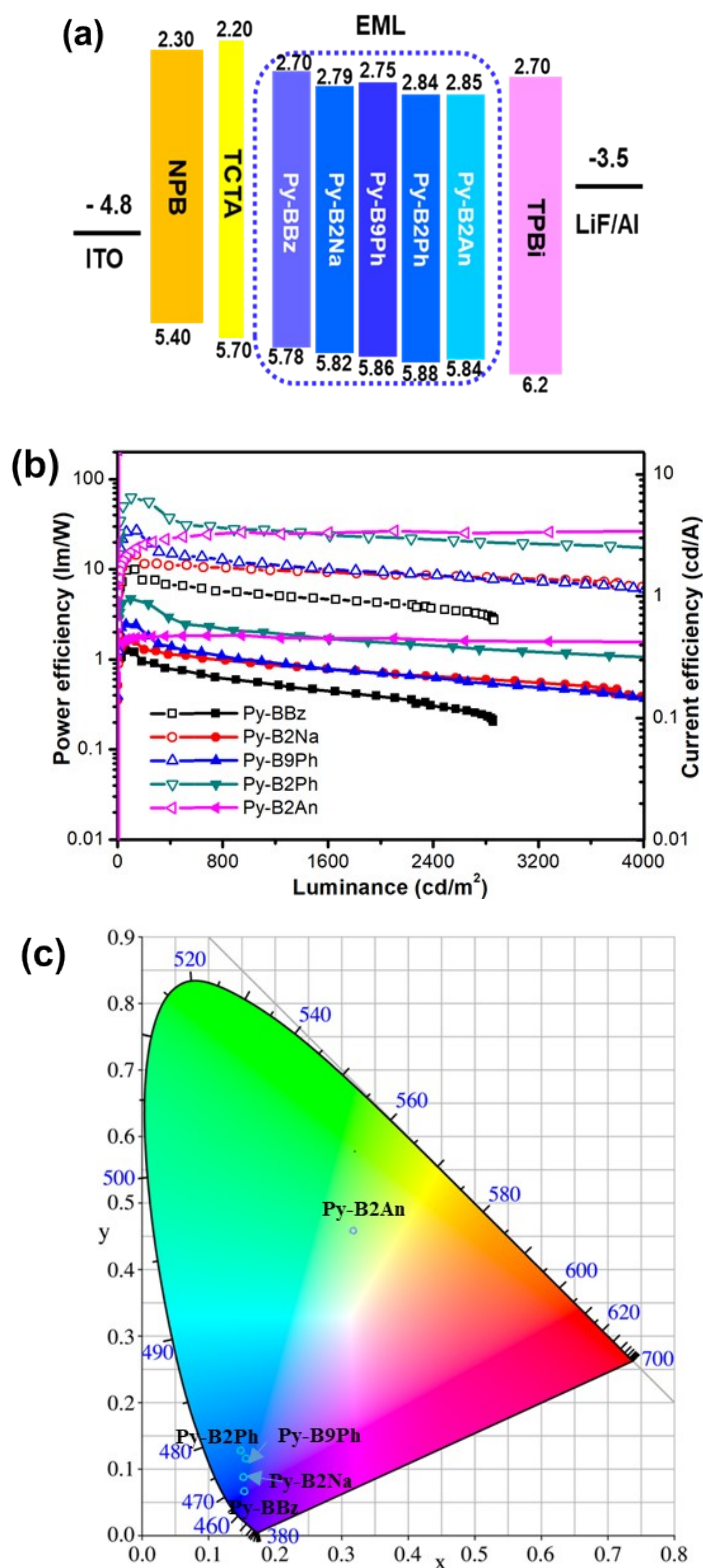

**Figure S4.** Nondoped devices: (a) energy level diagrams and device configurations, (b)

current efficiency–luminance–power efficiency, (c) Commission Internationale de l’Eclairage (CIE) chromaticity coordinate.

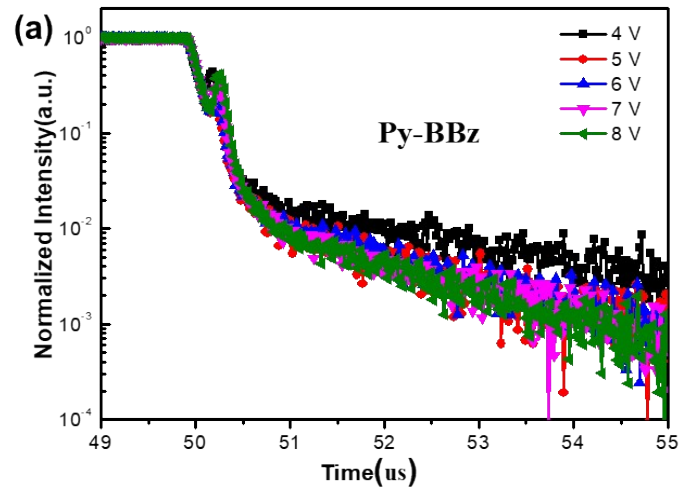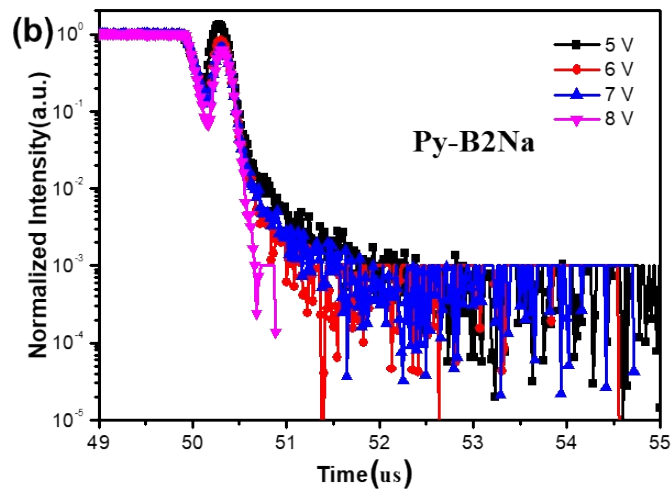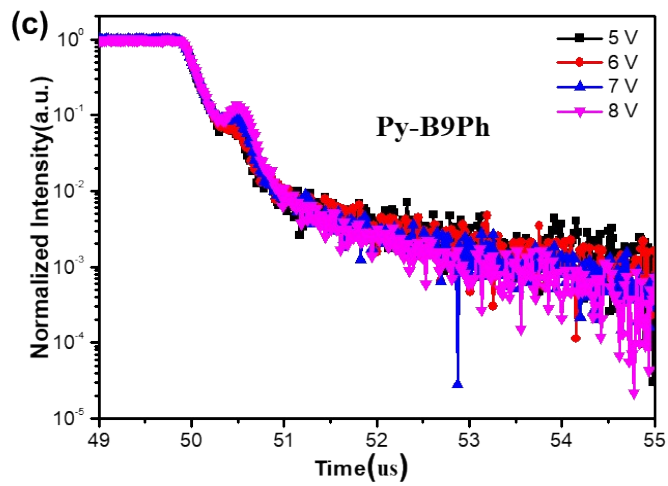

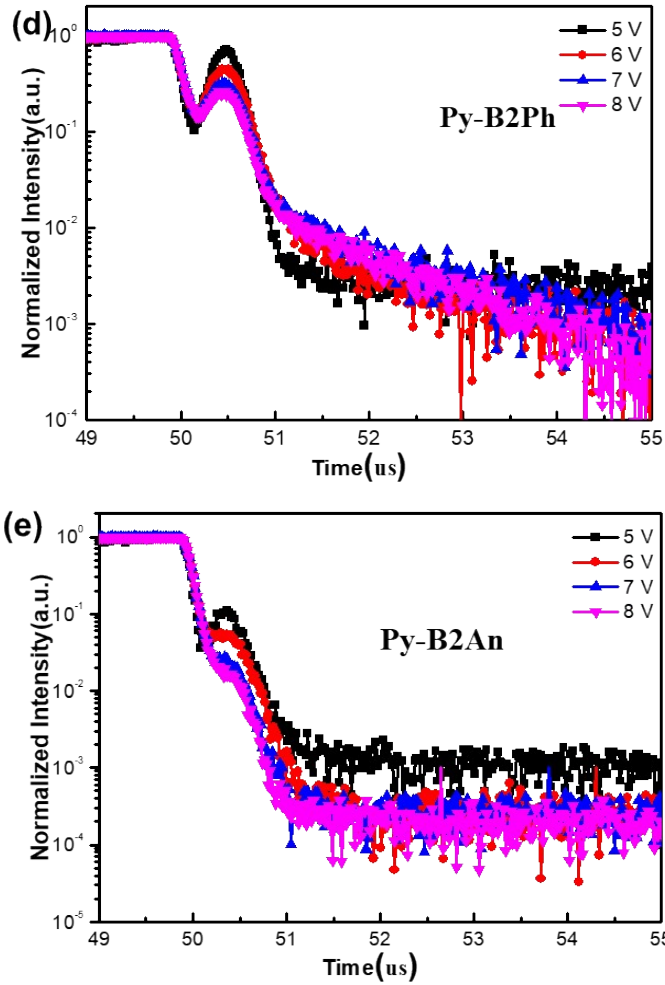

**Figure S5.** Transient electroluminescent decay of nondoped devices based on **Py-BBz**, **Py-BBz**, **Py-B9Ph**, **Py-B2Na**, **Py-B2Ph** and **Py-B2An**.

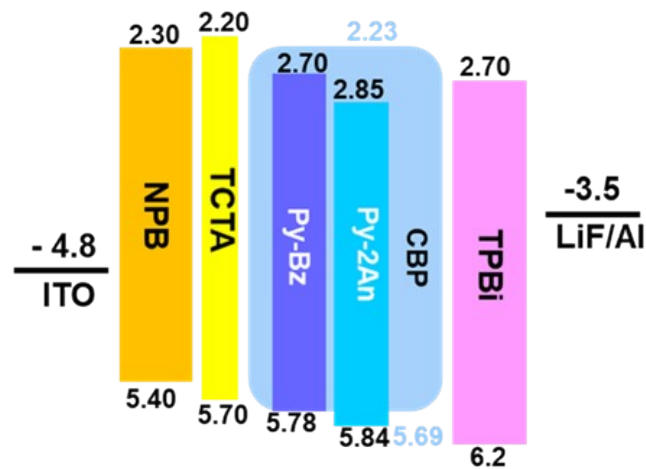

**Figure S6.** Energy level diagrams and device configurations of doped devices.

## 6. NMR Spectra

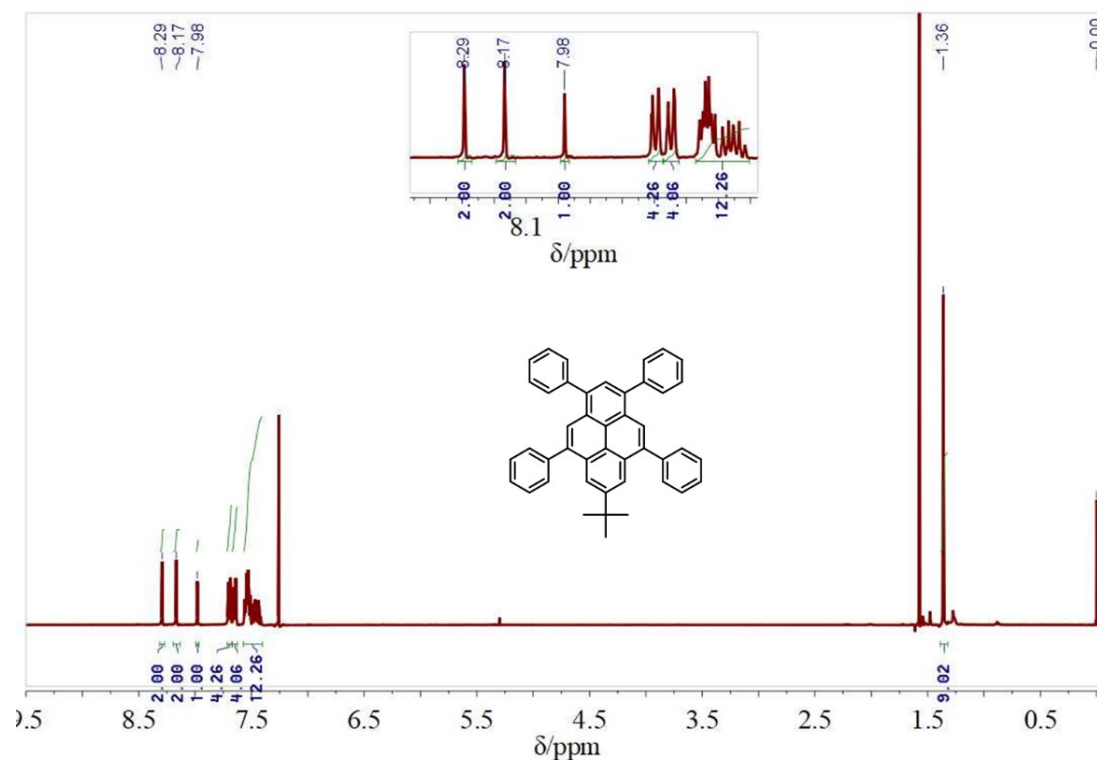

**Figure S7.**  $^1\text{H}$  NMR spectrum of compound **Py-BBZ** (400 MHz,  $\text{CDCl}_3$ ).

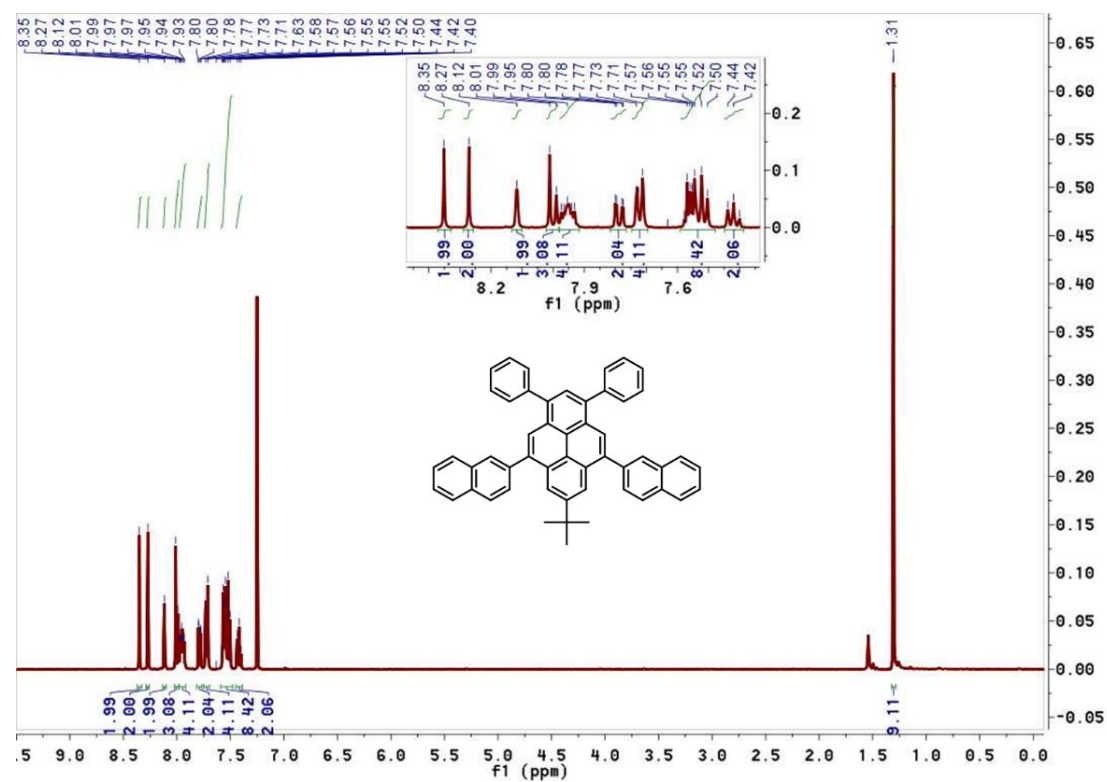

**Figure S8.**  $^1\text{H}$  NMR spectrum of compound **Py-B2Na** (400 MHz,  $\text{CDCl}_3$ ).



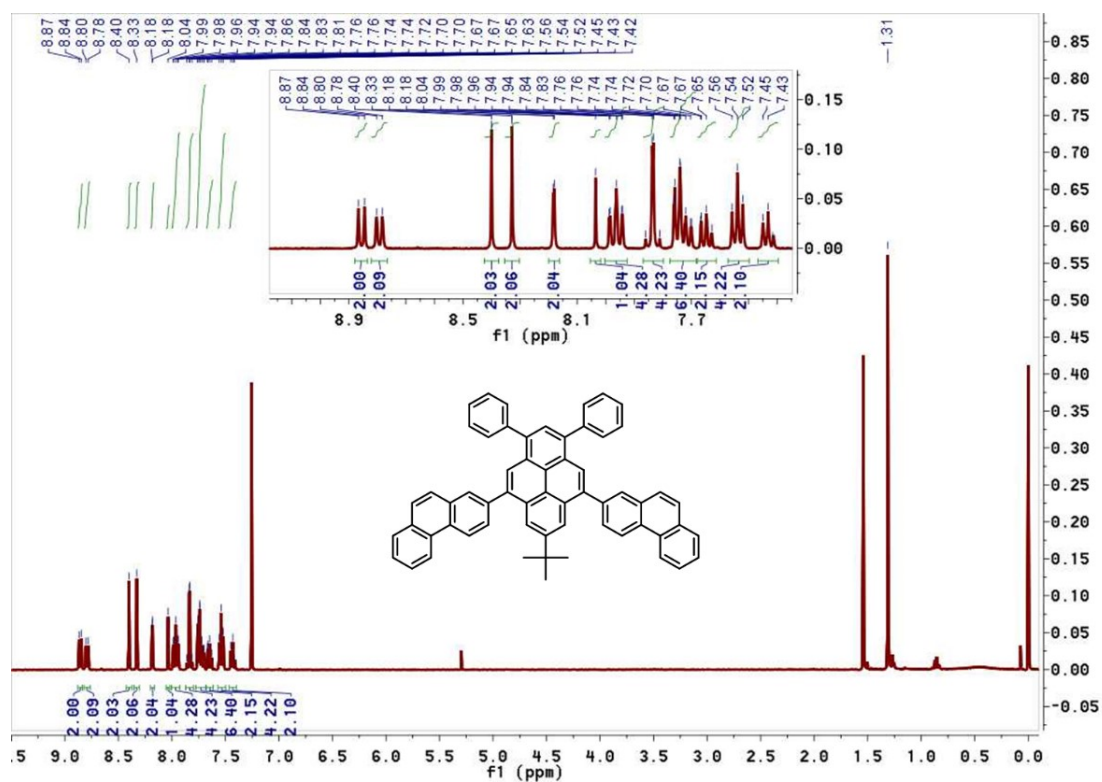

Figure S9.  $^1\text{H}$  NMR spectrum of compound **Py-B2Ph** (400 MHz,  $\text{CDCl}_3$ ).

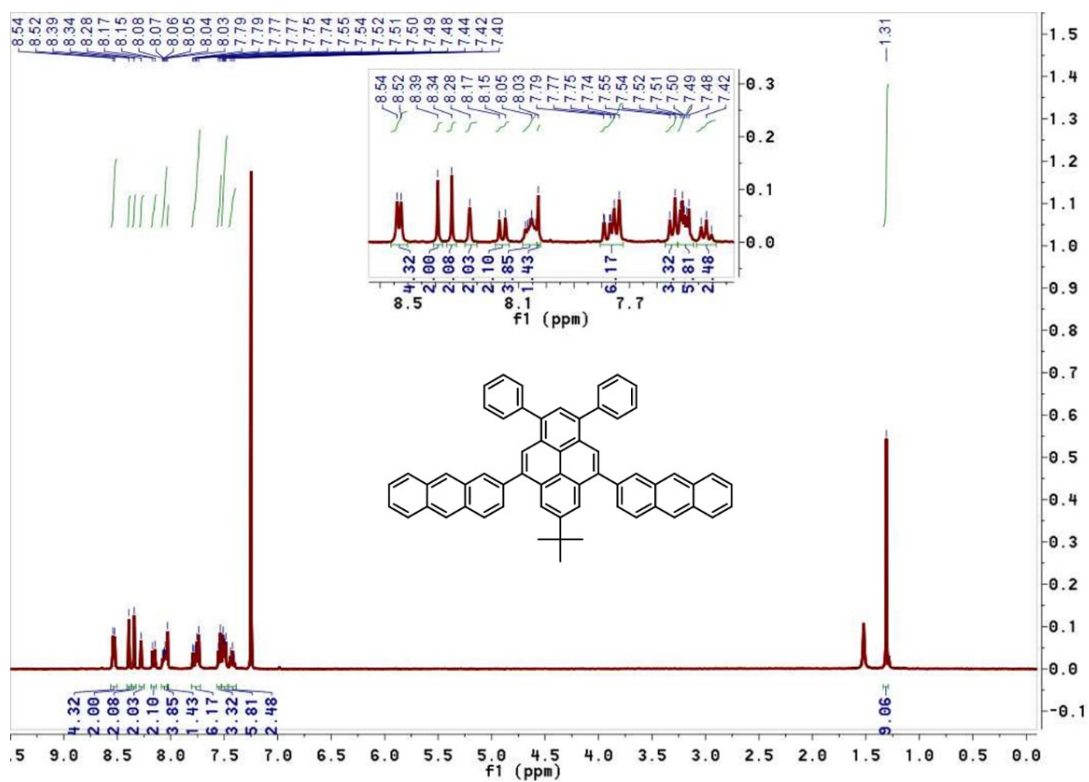

Figure S10.  $^1\text{H}$  NMR spectrum of compound **Py-B2An** (400 MHz,  $\text{CDCl}_3$ ).

## 7. Mass Spectra

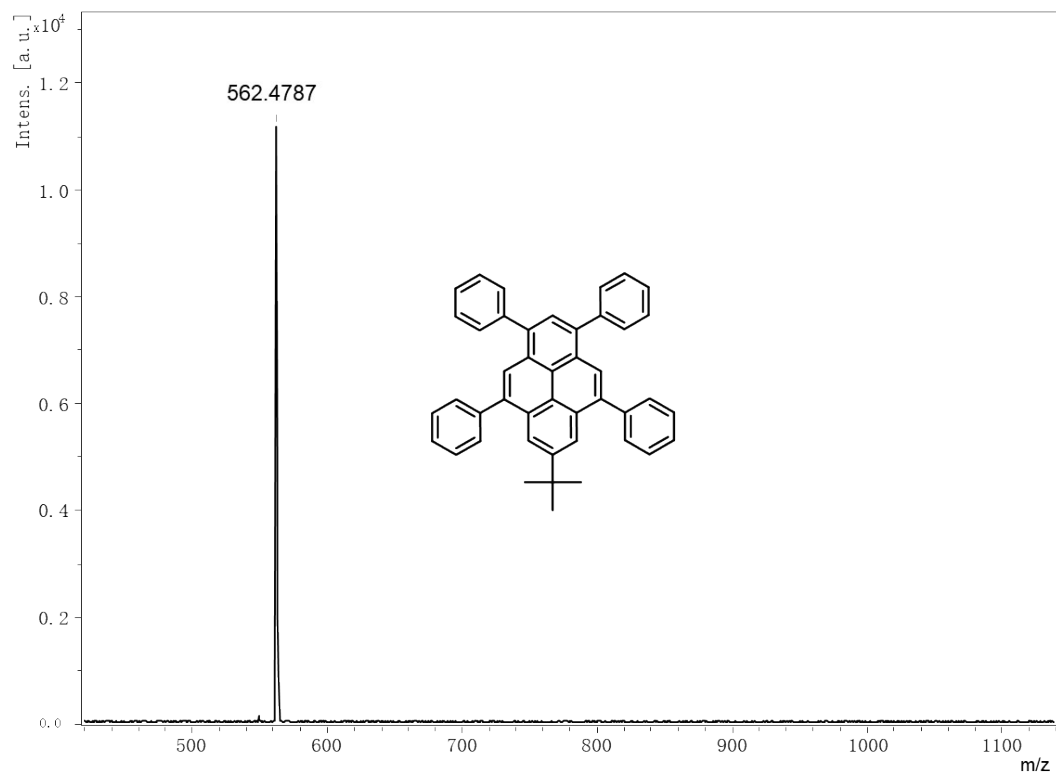

**Figure S11.** MALDI-TOF Mass spectra of compound **Py-BBZ**.

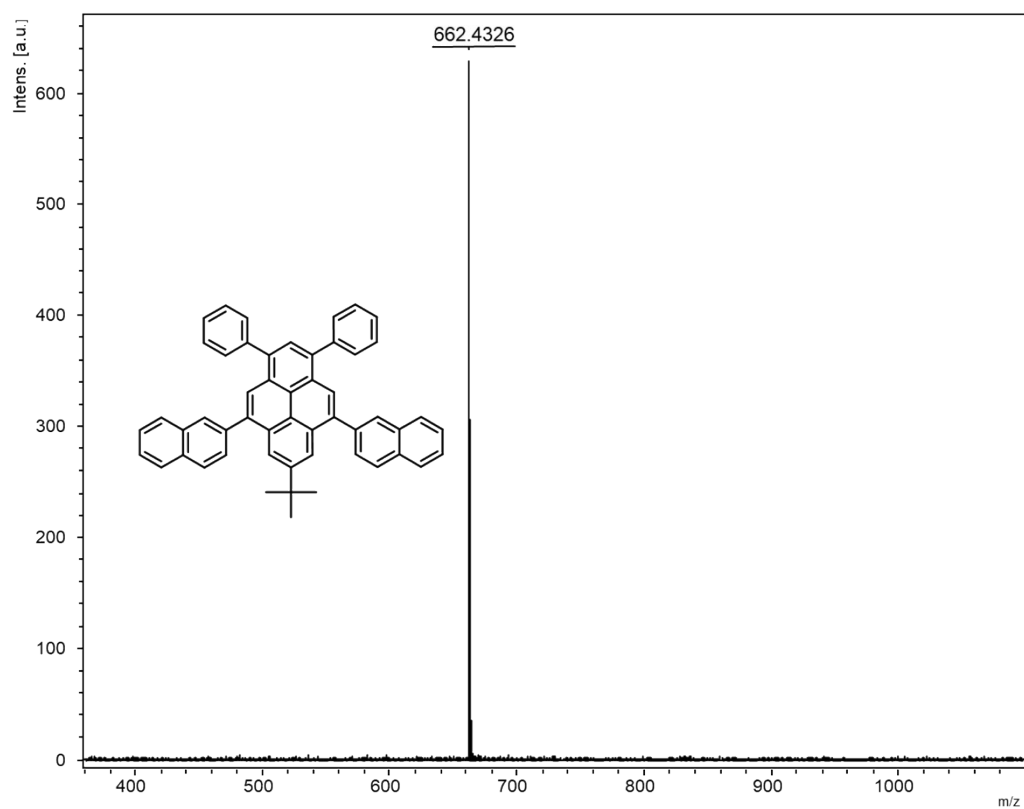

**Figure S12.** MALDI-TOF Mass spectra of compound **Py-B2Na**.

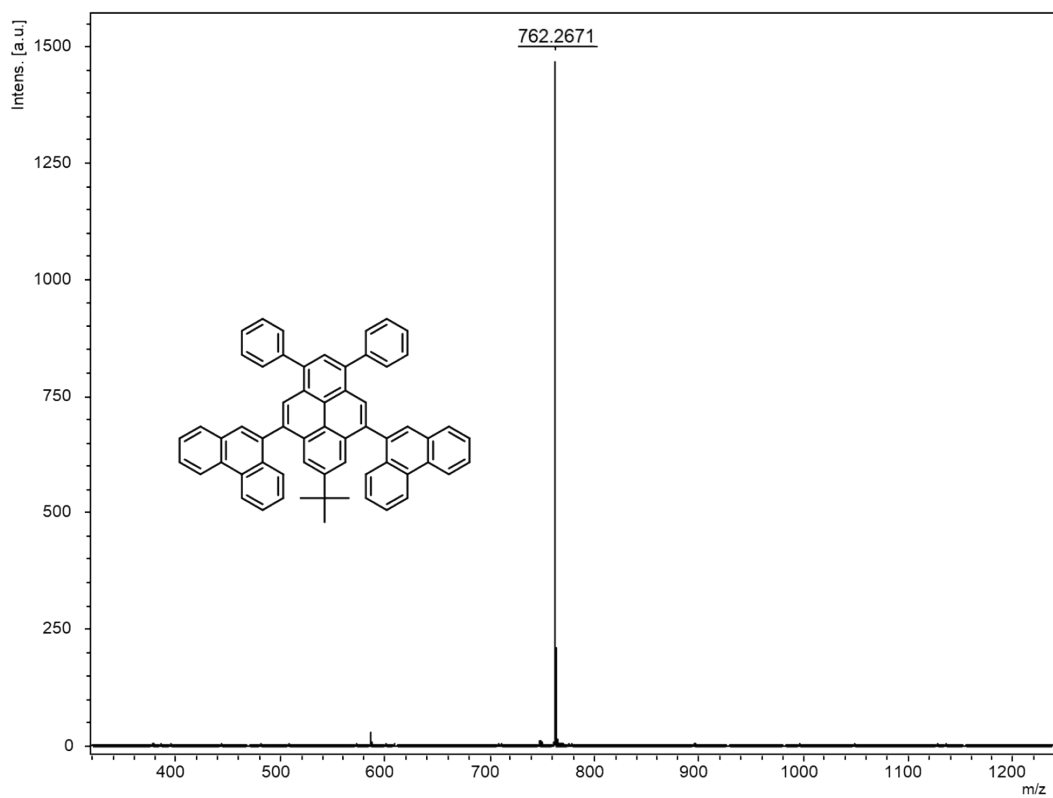

**Figure S13.** MALDI-TOF Mass spectra of compound **Py-B9Ph**.

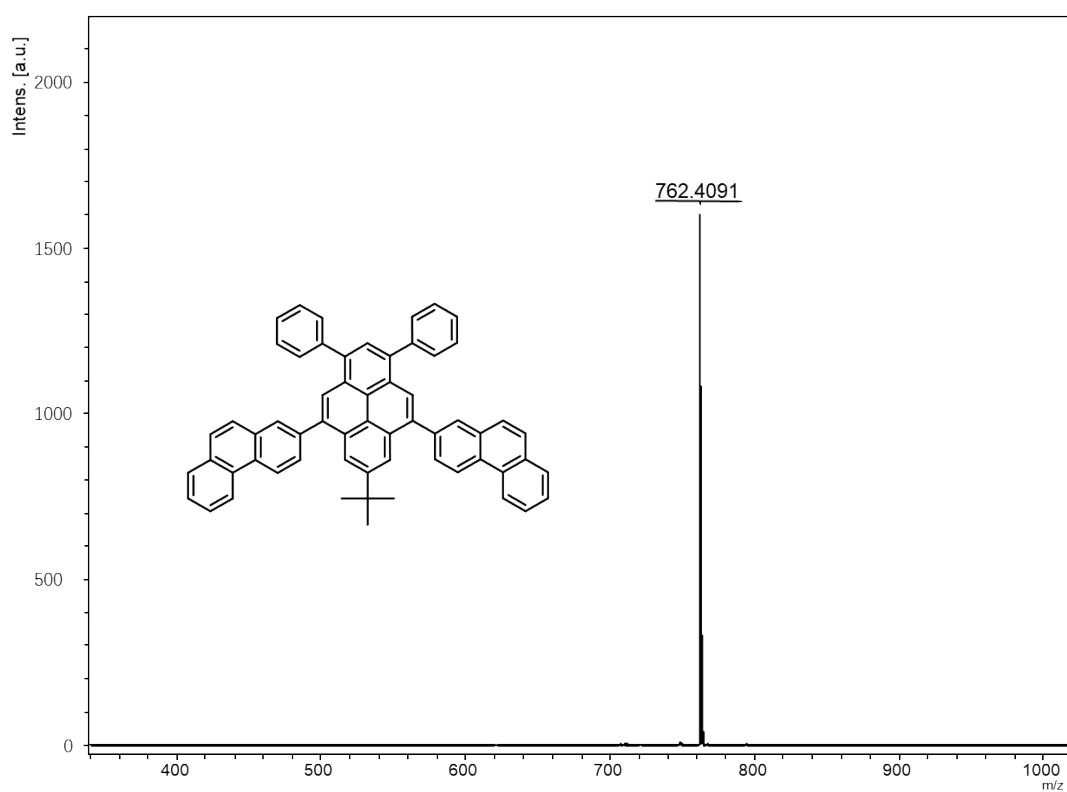

**Figure S14.** MALDI-TOF Mass spectra of compound **Py-B2Ph**.

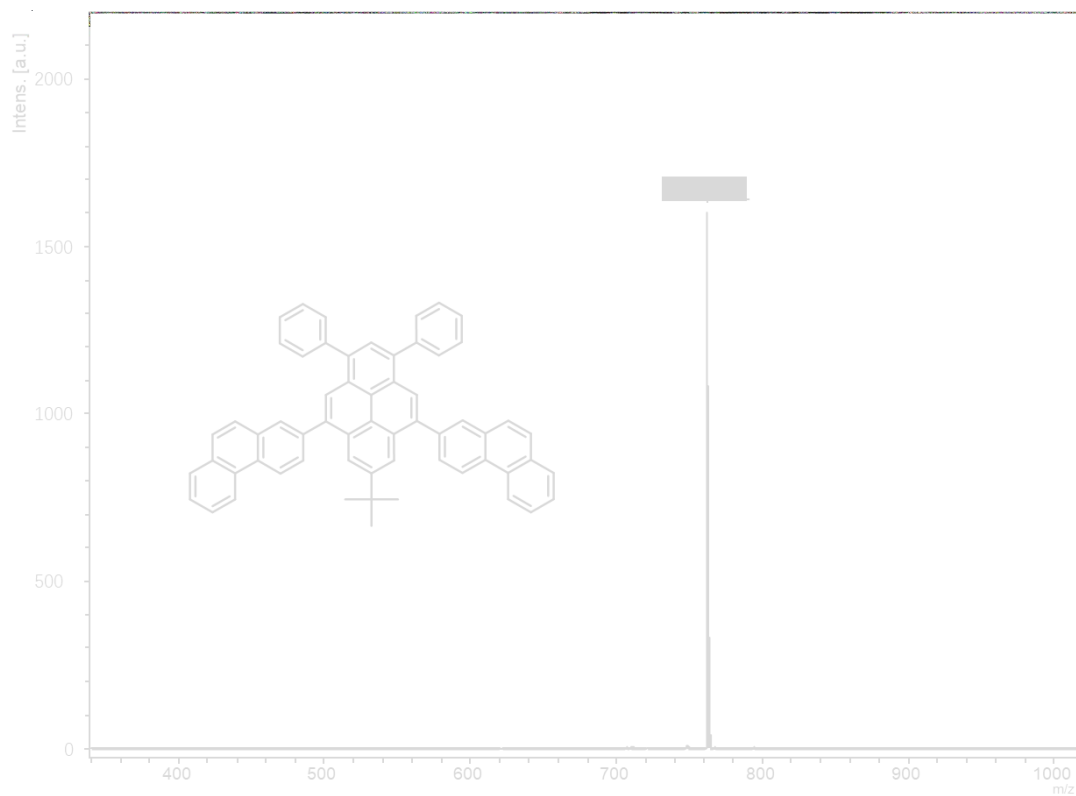

**Figure S15.** MALDI-TOF Mass spectra of compound **Py-B2An**.

## 8. References

- [S1] R. Liu, H. Ran, Z. Zhao, X. Yang, J. Zhang, L. Chen, H. Sun and J.-Y. Hu, *ACS Omega*, 2018, **3**, 5866–5875.
- [S2] H. Ran, Z. Zhao, X. Duan, F. Xie, R. Han, H. Sun and J.-Y. Hu, *J. Mater. Chem. C* 2021, **9**, 260–269.
